# Supplementary material for: Queuosine‐modified tRNAs confer nutritional control of protein translation
Source: PubMed Central journal article supplement — EMBO J. 2018 Aug 9;37(18):e99777. doi: 10.15252/embj.201899777 (PMC6138434; doi:10.15252/embj.201899777), 2018-08-09
Supplement: EMBJ-37-e99777-s001.pdf [file EMBJ-37-e99777-s001.pdf]

## *Appendix*

Tuorto et al.: Direct nutritional control of protein translation by queuosine

### Contents:

Appendix Table S1

Appendix Table S1:  
Sequences of primers and oligonucleotides

|                                 |                        |
|---------------------------------|------------------------|
| <b>454 bisulfite sequencing</b> |                        |
| mAsp-for                        | TGTTAGTATAGTGGTGAGTAT  |
| mAsp-rev                        | CTCCCATCAAAAAATTA      |
| mVal-for                        | GTTTTGTAGTGTAGTGGTTAT  |
| mVal-rev                        | TATTTCCACCCAATTTCAAACC |
| mGly-for                        | GGTGGTTTAGTGGTAGAATT   |
| mGly-rev                        | TACATTAACCAAAAATC      |
| <b>Northern probes</b>          |                        |
| tRNAAsp                         | ACCACTATACTAACGAGGA    |
| tRNAHis                         | CTAACCACTATACGATCACGGC |
| tRNATyr                         | TACCAACTGAGCTATCGAAGG  |
| tRNAAsn                         | CTGGGTGGGCTCGAAAC      |
