# Supplementary figures and images for: Queuosine‐modified tRNAs confer nutritional control of protein translation
Source: PubMed Central journal article supplement — EMBO J. 2018 Aug 9;37(18):e99777. doi: 10.15252/embj.201899777 (PMC6138434; doi:10.15252/embj.201899777), 2018-08-09

ox

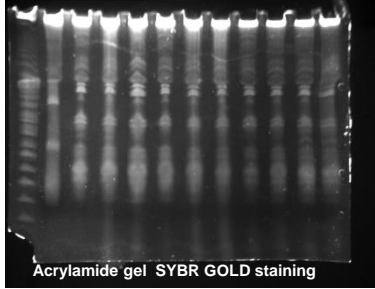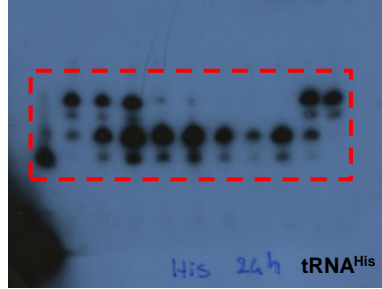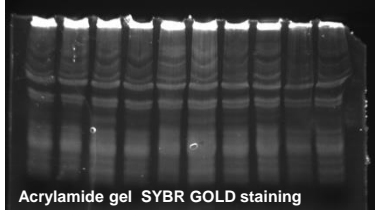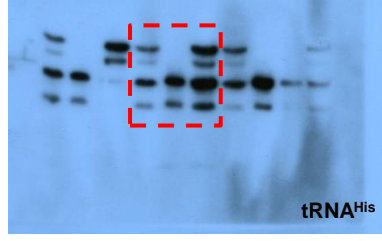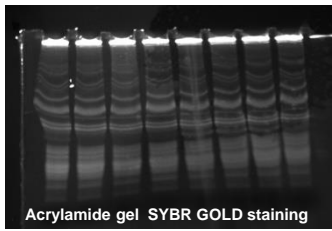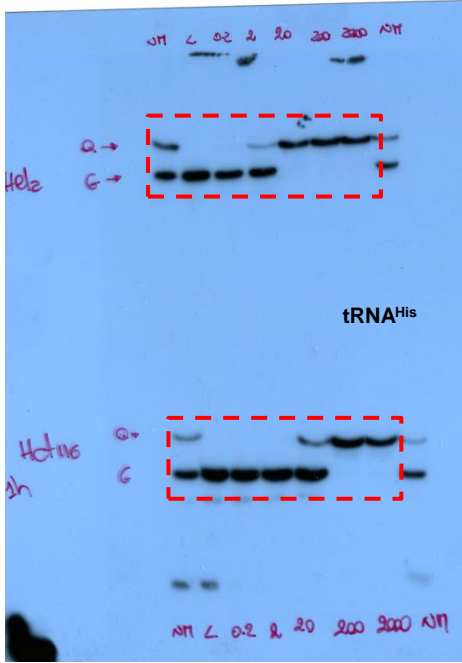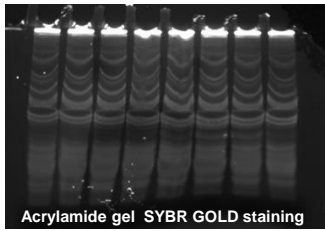

Supplement: EMBJ-37-e99777-s006.pdf [file EMBJ-37-e99777-s006.pdf]

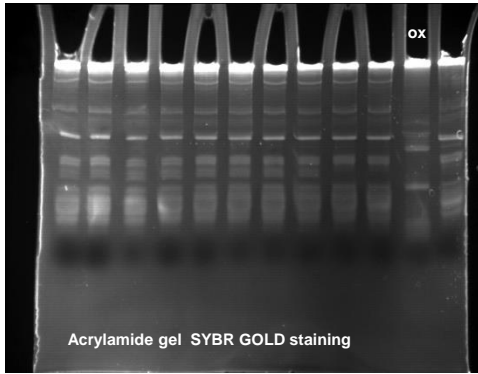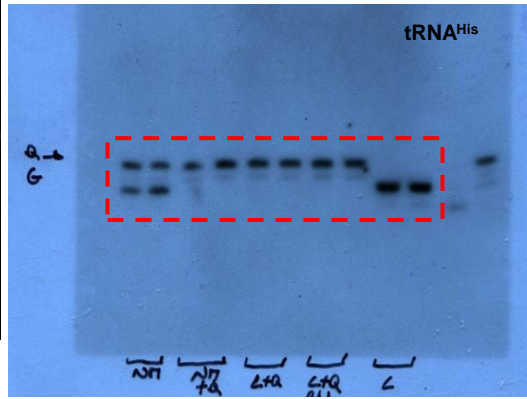

Supplement: EMBJ-37-e99777-s007.pdf [file EMBJ-37-e99777-s007.pdf]

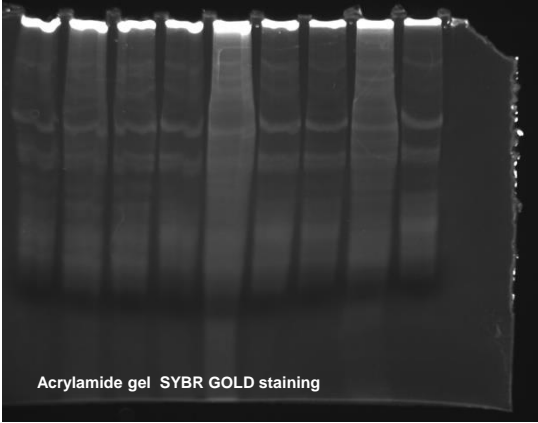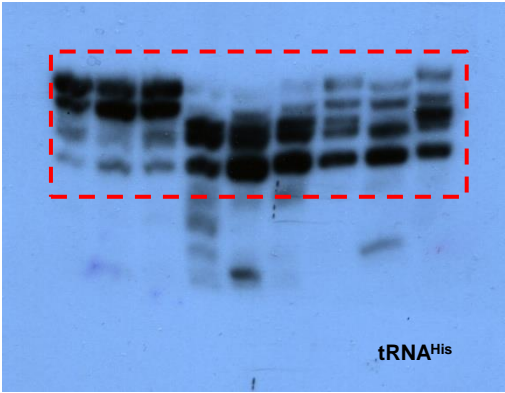

Supplement: EMBJ-37-e99777-s008.pdf [file EMBJ-37-e99777-s008.pdf]
